# Supplementary material for: Structural evolution and carrier scattering of Si nanowires as a function of oxidation time
Source: Royal Society of Chemistry journal article supplement (doi:10.1039/c4tc01505c), 2015-01-01
Supplement: c4tc01505c1.pdf [file c4tc01505c1.pdf]

# Supplementary Information for “Structural Evolution and Carrier Scattering of Si Nanowires as a Function of Oxidation Time”

Jung min Bae<sup>1</sup>, Woo-Jung Lee<sup>1,3</sup>, Jin won Ma<sup>1</sup>, Jung hun Kim<sup>1</sup>, Seung hun Oh<sup>1</sup>, Mann-Ho Cho<sup>1,\*</sup>,  
Kang chul<sup>2</sup>, Seonghoon Jung<sup>4</sup>, Jaehun Park<sup>4</sup>

*<sup>1</sup>Department of physics and applied physics, Yonsei University, Seoul 120-749, Korea*

*<sup>2</sup>Advanced Photonic Research Institute, Gwangju Institute Science and Technology, Gwangju 500-712, Korea*

*<sup>3</sup>Electronics and Telecommunications Research Institute, 218 Gajeongno, Yuseong-gu, Daejeon 305-700, Korea*

*<sup>4</sup>Pohang Accelerator Laboratory, Pohang University of Science and Technology, Pohang, 790-784, Korea*

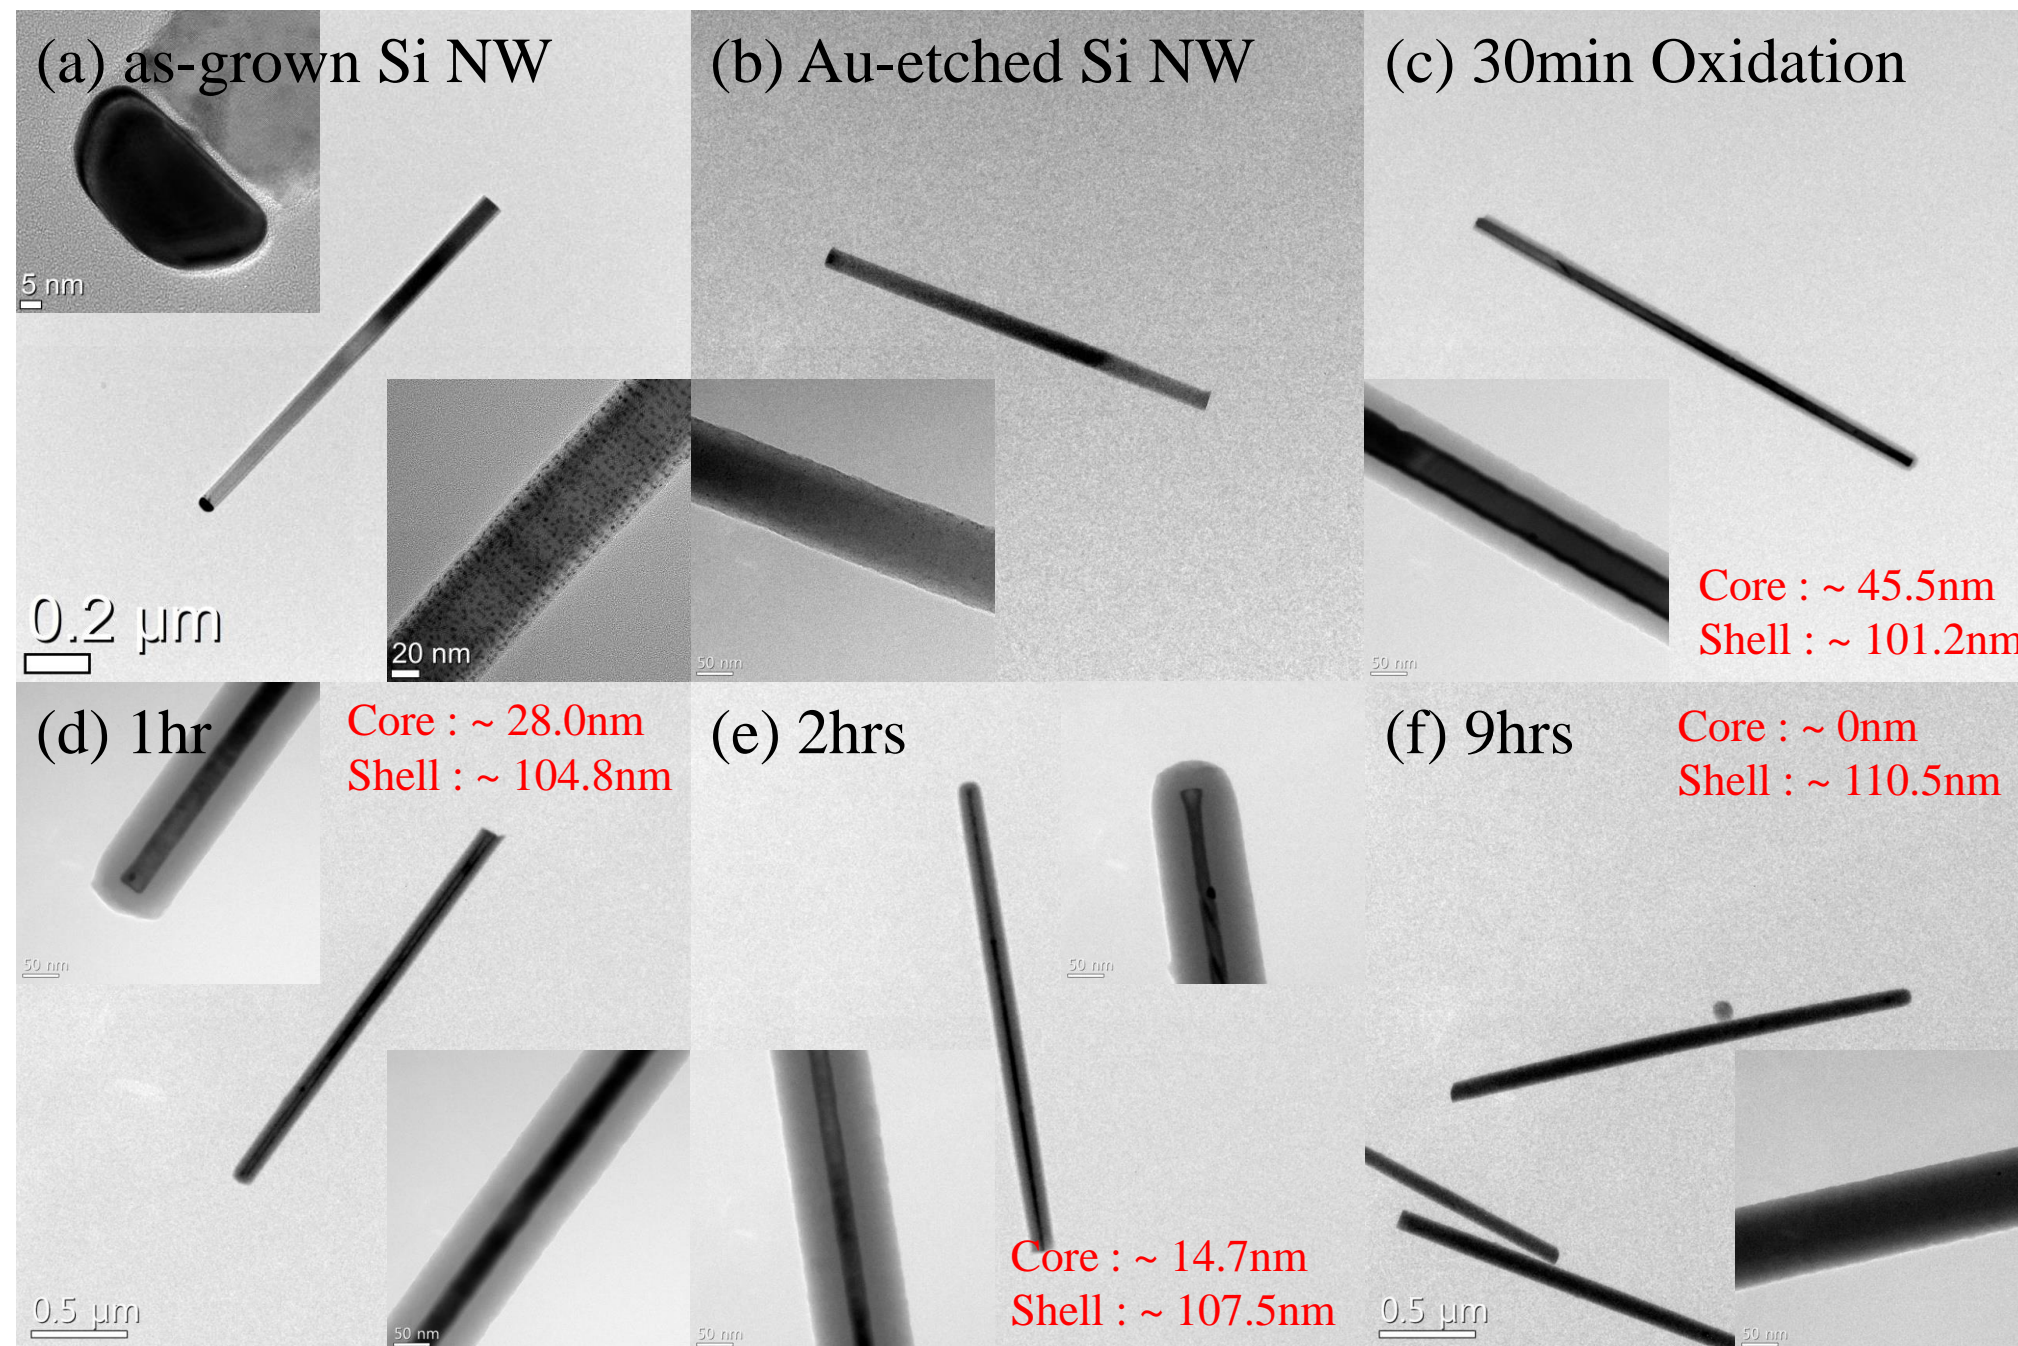

**Figure S1.** TEM images of Si NW (a) and Au-etched Si NW (b). The oxidation process involved treating Au-etched Si NWs at a temperature of 900 °C with the the oxidation time varied from 30 min (c), 1 hr (d), 2 hrs (e), and 9 hrs (f). They formed a Si/SiO<sub>2</sub> core/shell structure: the Si core became thin while the SiO<sub>2</sub> shell thickens as the oxidation time increased.

Supporting Figure S1.

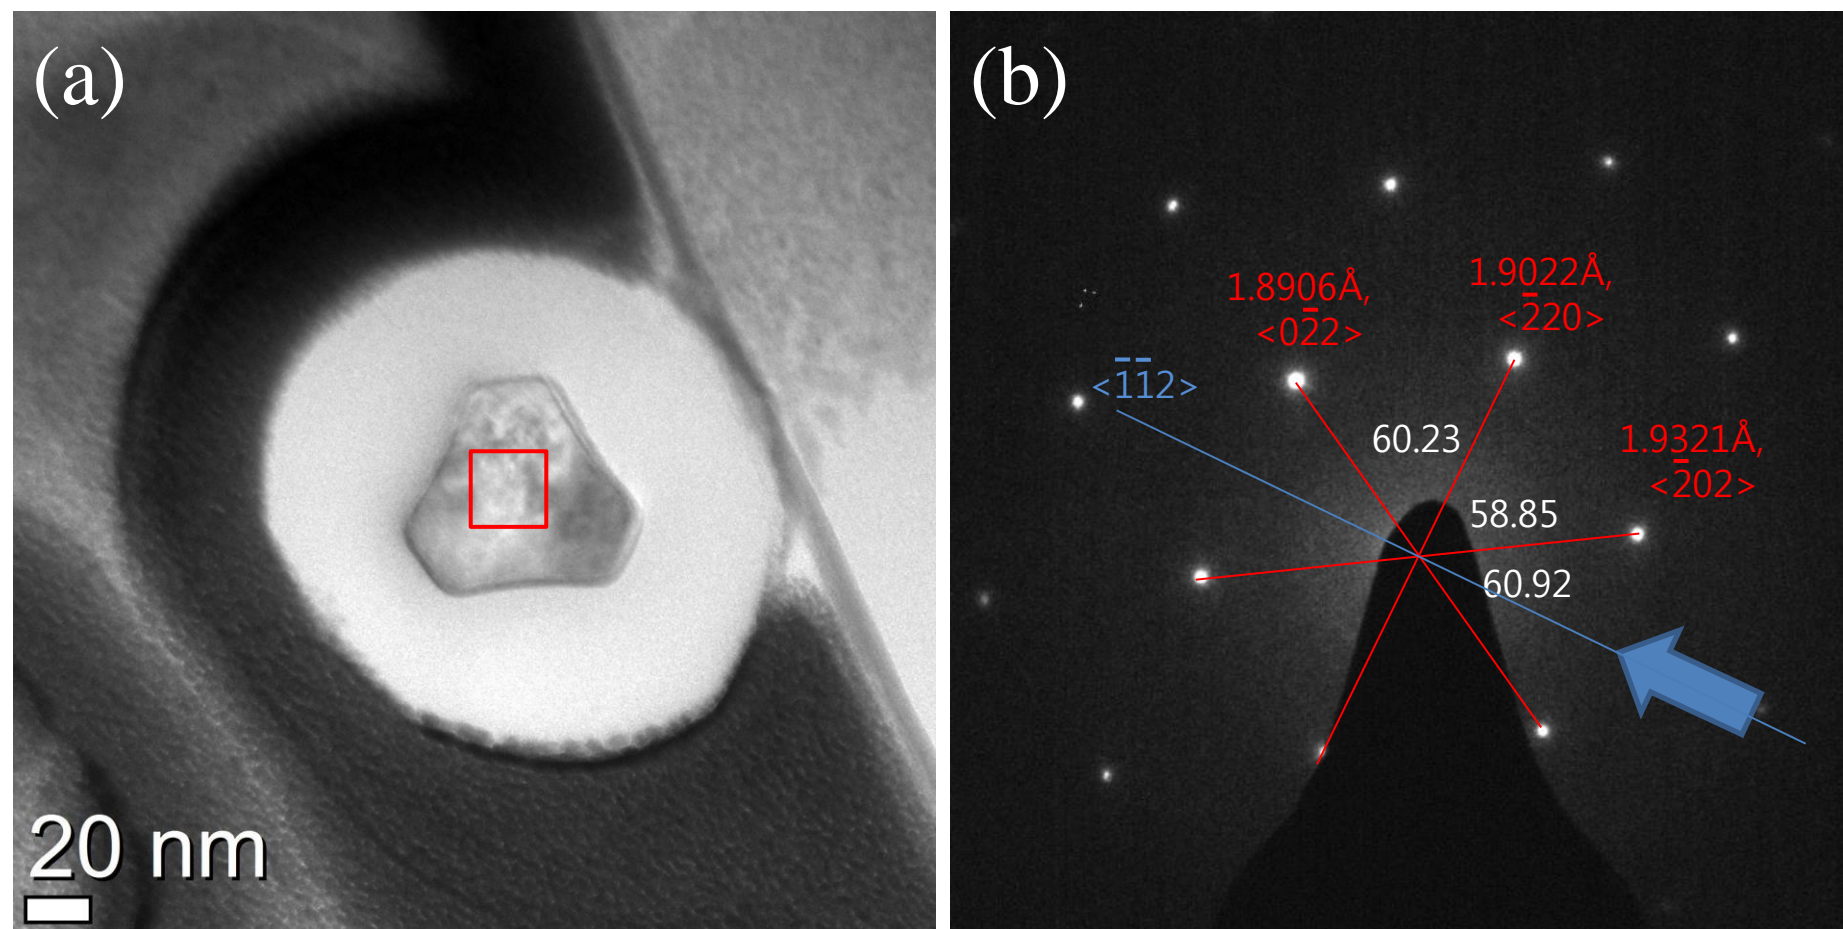

**Figure S2.** TEM image and selective area electron diffraction pattern of the cross-sectional shape of oxidized Si NW. The Si NW was grown in the [111] direction (a) and six side direction revealed {112} facets.

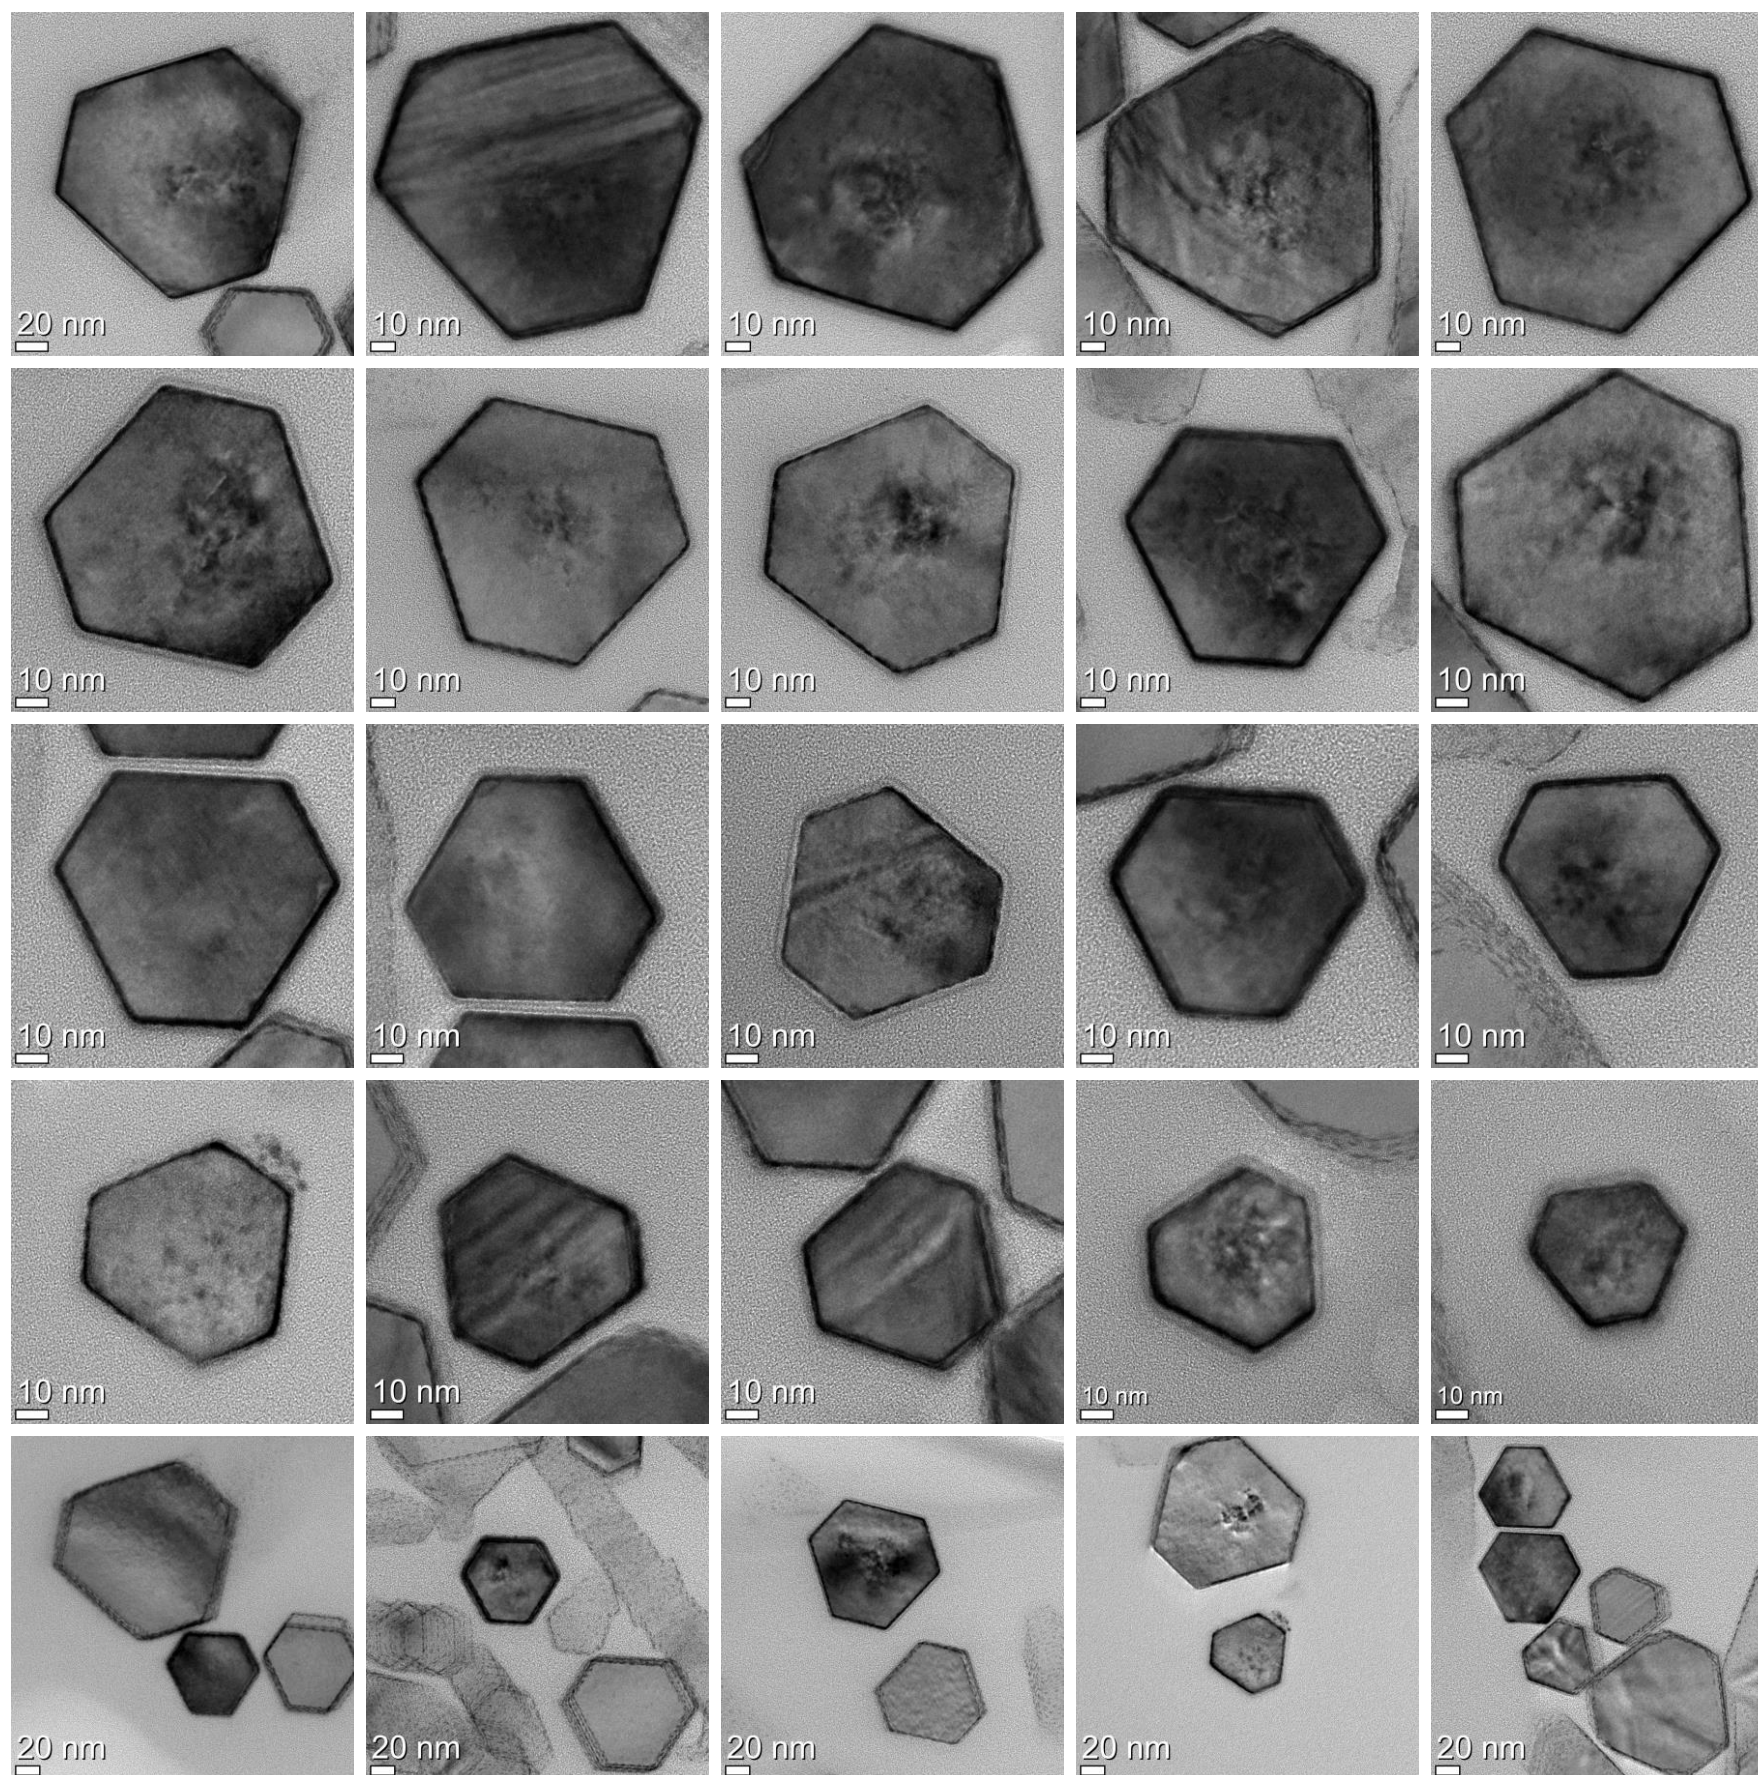

**Figure S3.** HR-TEM images of the cross-sectional shape of as-grown Si NWs. To investigate whether 3-fold symmetry shape depends on diameter, we observed the cross-sectional shape of numerous Si NWs.

Supporting Figure S3.

| <b>Oxidation time</b> | <b>Average of 'D'<br/>(nm)</b> | <b>STDEV of 'D'<br/>(nm)</b> | <b>Number of<br/>nanowires</b> |
|-----------------------|--------------------------------|------------------------------|--------------------------------|
| As-grown              | 82.5                           | 16                           | 100                            |
| 30 min                | 86.6                           | 11.51                        | 58                             |
| 1 hr                  | 85.3                           | 13.3                         | 63                             |
| 2 hr                  | 84.4                           | 10.6                         | 55                             |
| 9 hr                  | 82.8                           | 10.4                         | 53                             |

**Table S1.** Summary of the calculated initial diameters from the oxidized Si NWs as a function of oxidation time.

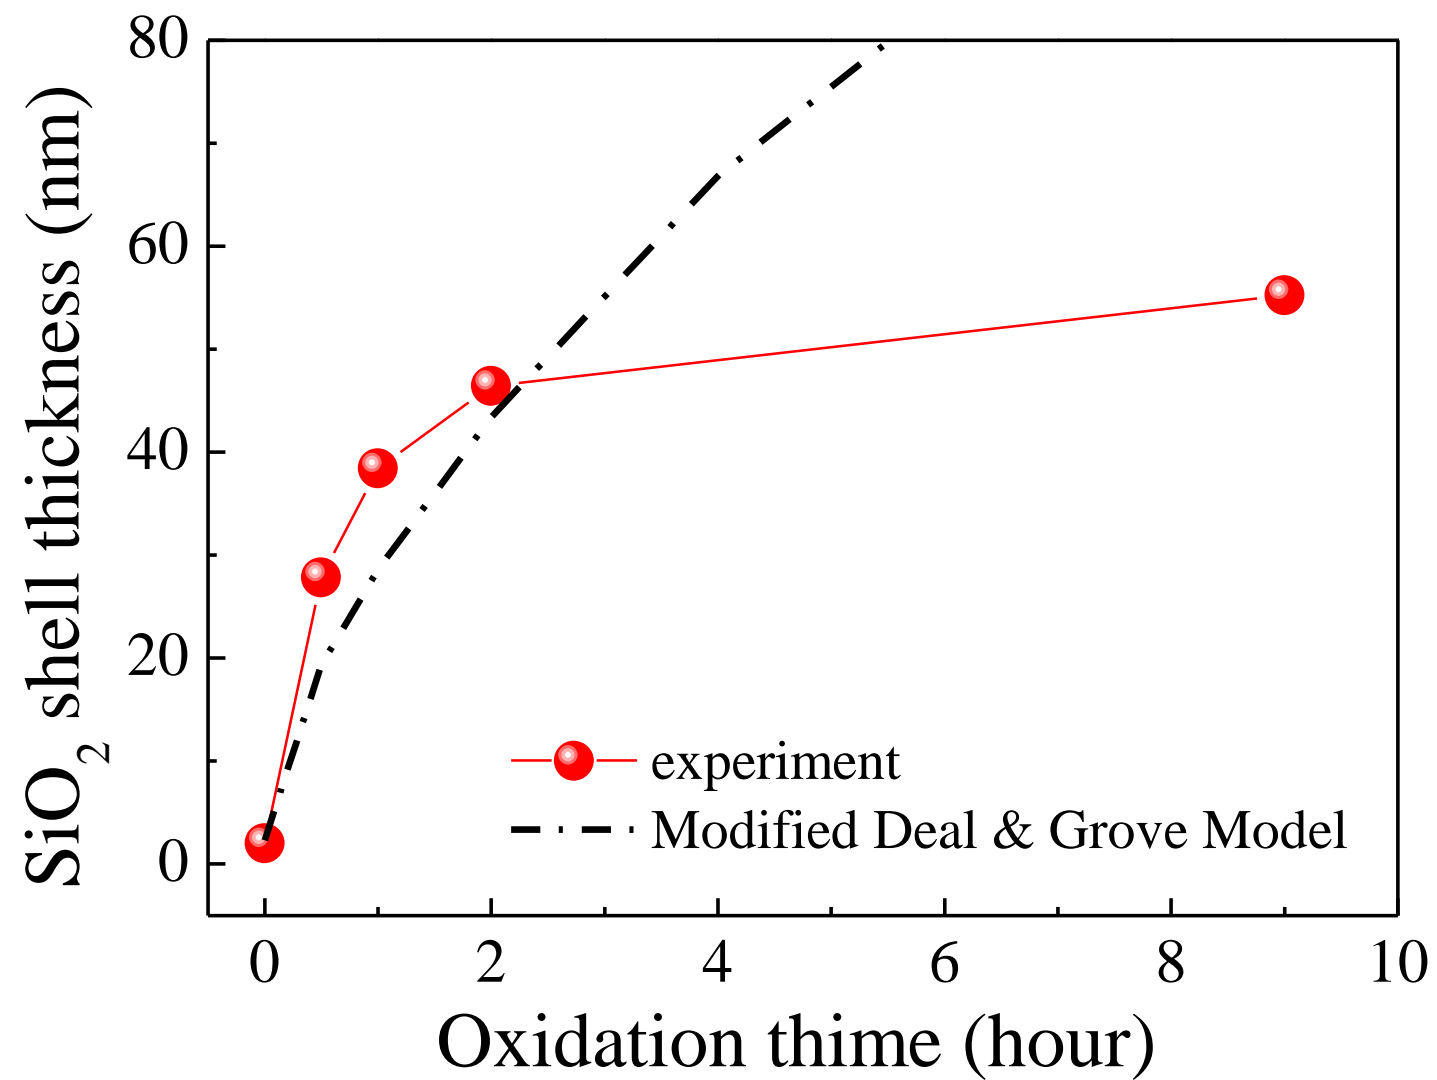

**Figure S4.** Based on the results in Table S1, the SiO<sub>2</sub> shell thickness formed at Si NWs with similar initial diameters are measured as a function of oxidation time. The tendency of SiO<sub>2</sub> shell thickness to change depending on oxidation time is shown in graphically. Moreover, the change in SiO<sub>2</sub> shell thickness as a function of oxidation time was compared with modified Deal-Grove curve <sup>32</sup>.

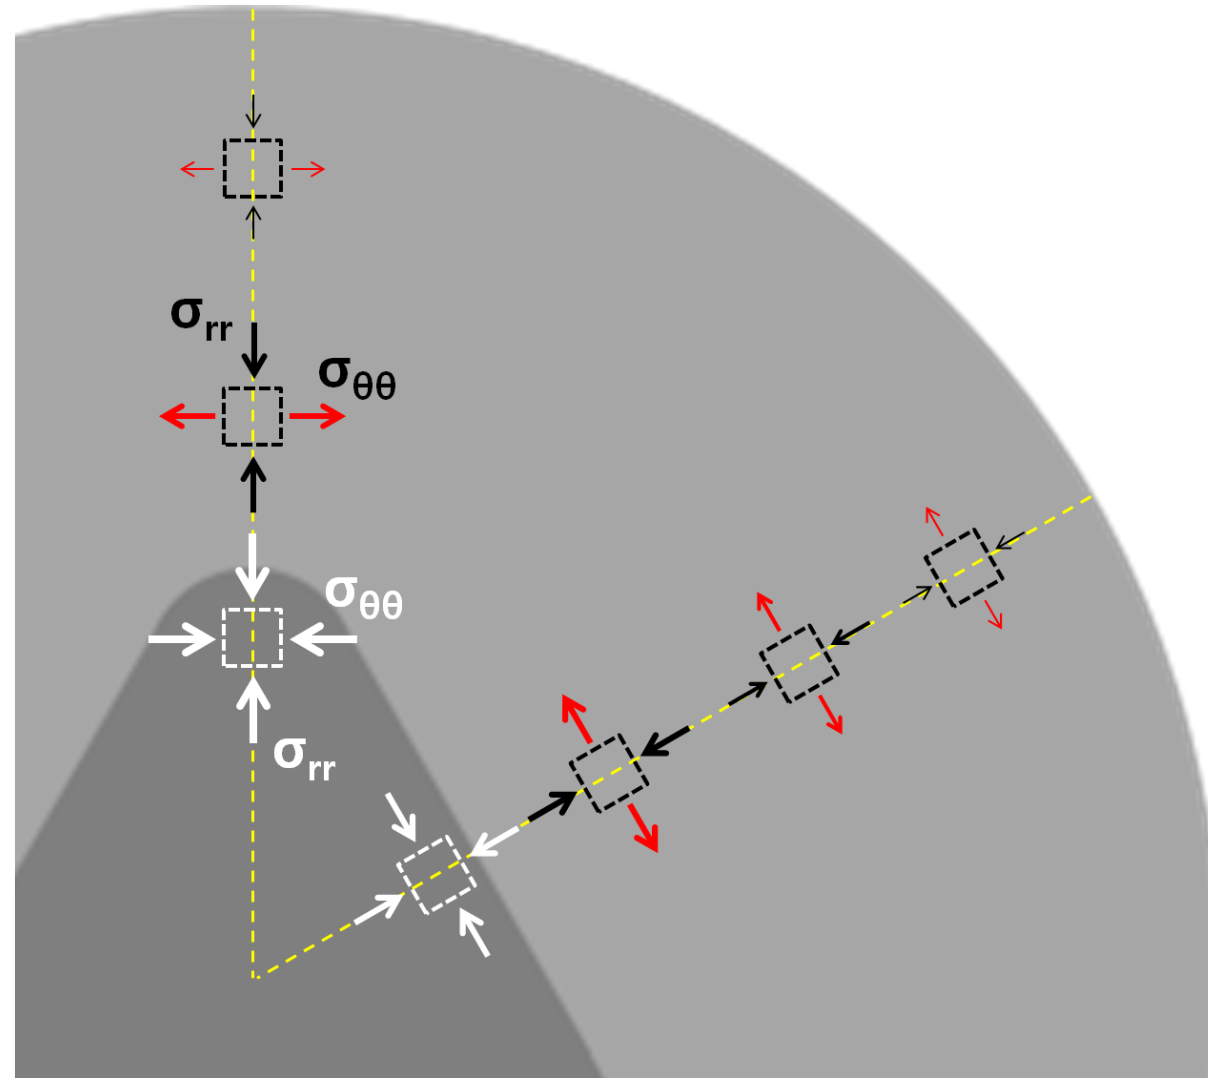

**Figure S5.** The schematic diagram presenting the stress component. In the case of a SiO<sub>2</sub> shell, compressive stress is induced along the perpendicular direction while tensile stress occurs parallel to the interface of Si/SiO<sub>2</sub>, and in case of the Si core, compressive stress is induced along both the perpendicular and parallel directions to the interface of Si/SiO<sub>2</sub>.

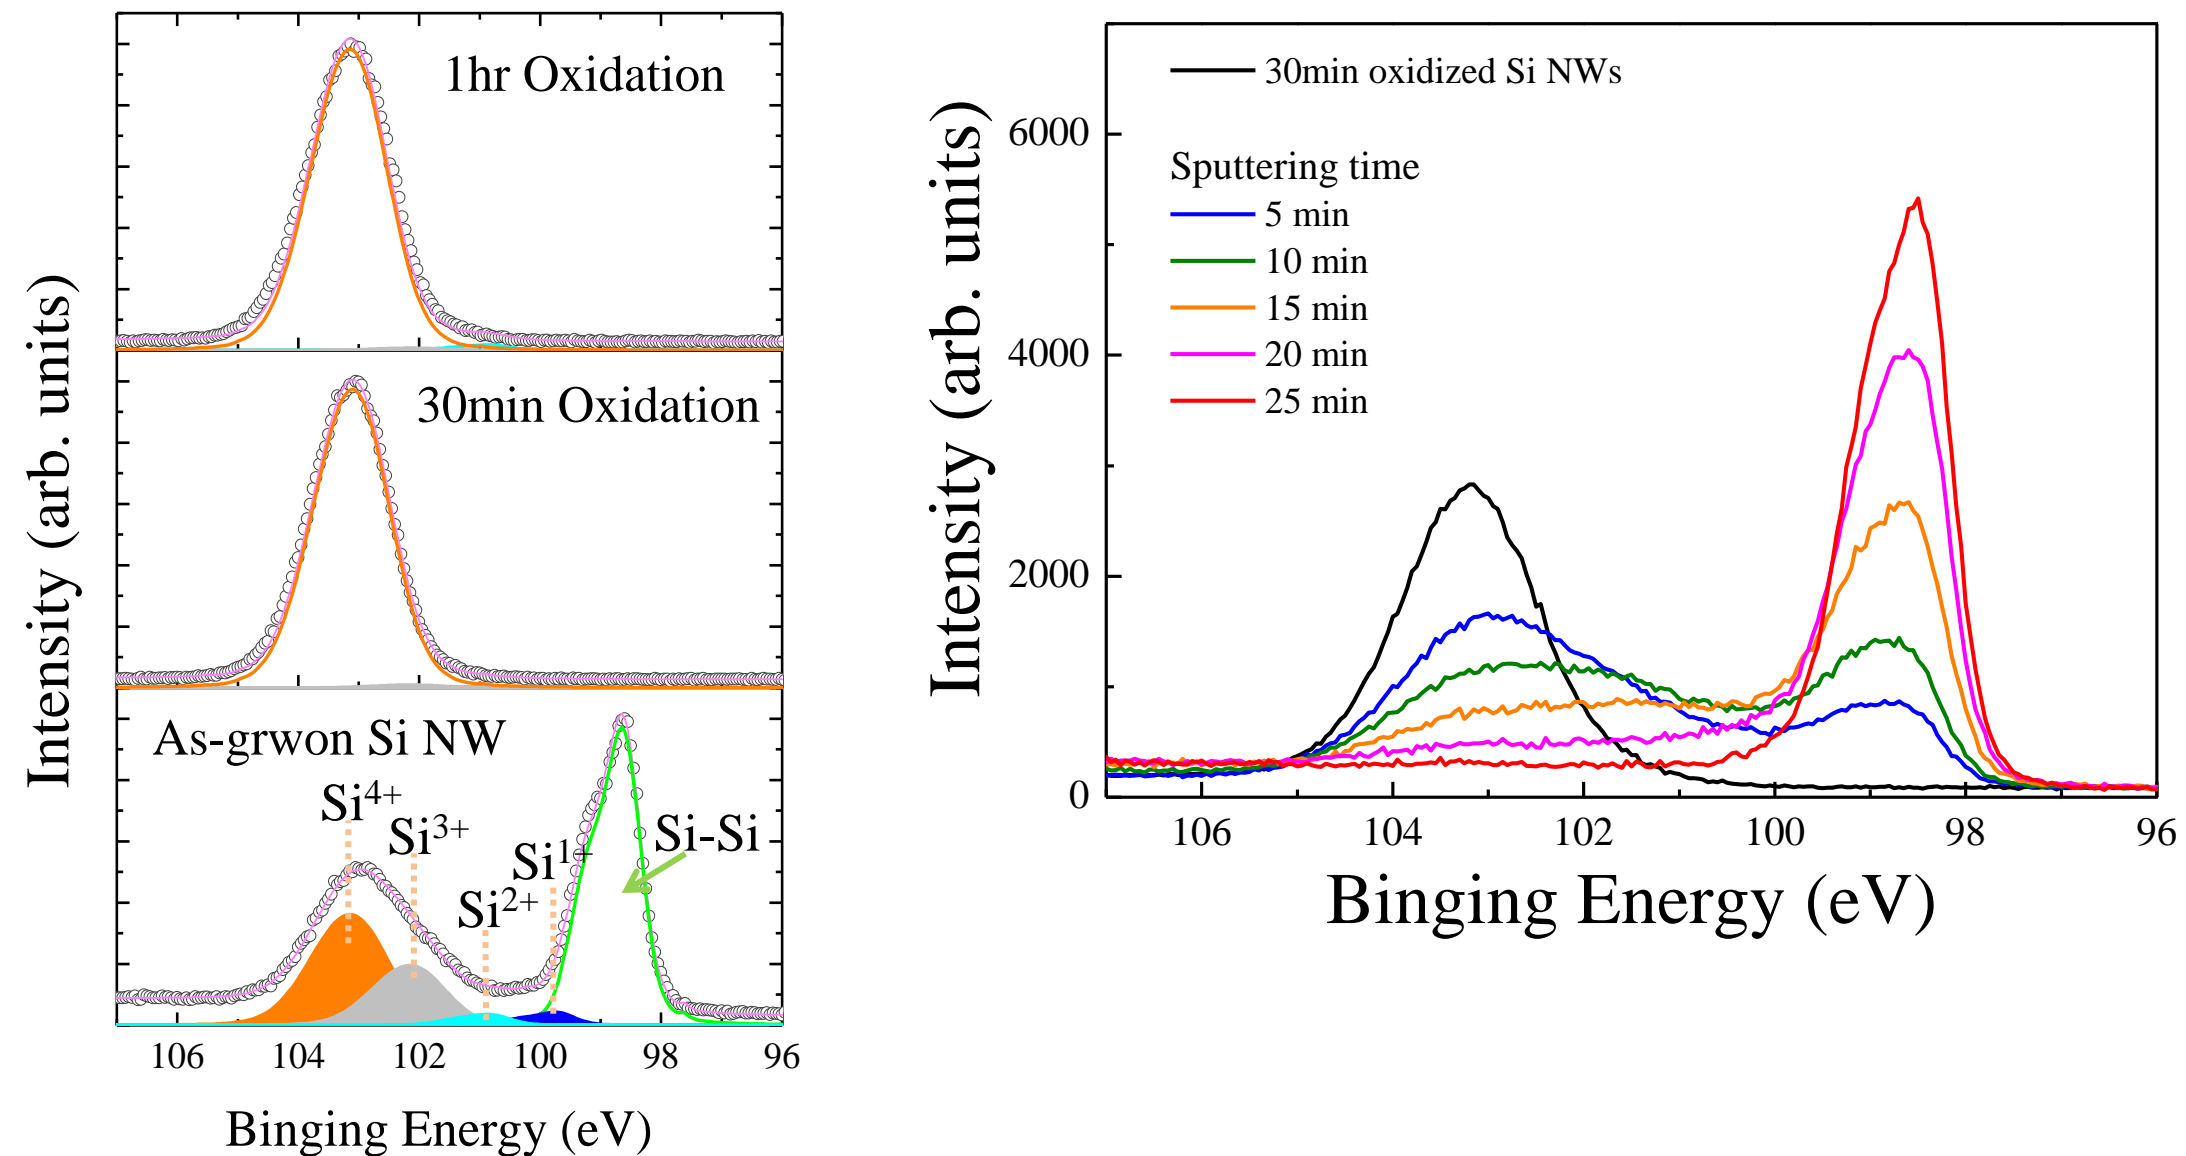

**Figure S6. Left:** The XPS spectra for Si 2*p* core-level obtained from the as-grown and oxidized Si NWs as a function of oxidation time. Various SiO<sub>x</sub> defect state of Si<sup>1+</sup>, Si<sup>2+</sup> and Si<sup>3+</sup> are observed, which is caused by the formation of native oxide. **Right:** the Si 2*p* spectra as a function of sputtering time in case of oxidized Si NWs for 30 min with SiO<sub>2</sub> shell thickness of 28 nm. While SiO<sub>2</sub> peak only revealed before the sputtering, SiO<sub>x</sub> state began to emerge with increasing sputtering time from 5 min to 20 min. After sputtering for 25 min, the SiO<sub>2</sub> shell was completely removed and the SiO<sub>x</sub> state also disappeared; i.e. defect states are distributed in oxidized Si NWs from the interface between the Si core and SiO<sub>2</sub> shell to near the subsurface of the SiO<sub>2</sub> shell.
